# Supplementary material
Source: Springer Nature journal article supplement (https://www.springermedizin.de/resource/supplementary/12889_2012_3987_MOESM2_ESM.pdf/9491124)

**Figure 2** - Perceived partner's response for HIV positive result among pregnant women attending ANC in Health facilities of Gondar town -----16

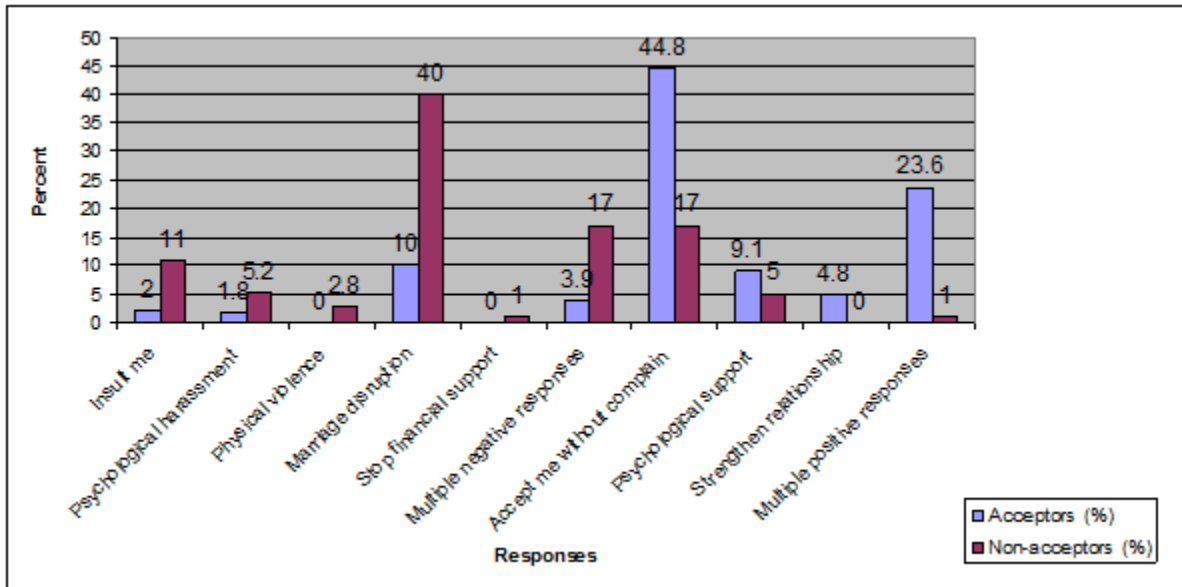

Supplement: MOESM2 [file 9491124]
